# Supplementary material
Source: PubMed Central journal article supplement (PMC11094642)
Supplement: jama-e240821-s002.pdf [file jama-e240821-s002.pdf]

## Data Sharing Statement

### Data

**Data available:** Yes

**Data types:** Deidentified participant data

**How to access data:** Data can be made available by sending a manuscript proposal and a data use agreement to the corresponding author, [bspring@northwestern.edu](mailto:bspring@northwestern.edu)

**When available:** beginning date: 11-01-2024, end date: 10-31-2029

### Supporting Documents

**Document types:** Informed consent form

**How to access documents:** [bspring@northwestern.edu](mailto:bspring@northwestern.edu)

**When available:** With publication

### Additional Information

**Who can access the data:** Researchers whose proposed use of the data has been approved

**Types of analyses:** systematic reviews, meta-analyses, secondary analyses, methods development

**Mechanisms of data availability:** After approval of a proposal and with a signed data use agreement
